7. Broom, B.: Intermittent positive-pressure respiration and therapeutic bronchial lavage in intractable status asthmaticus, *Lancet* 1: 899, 1960.
8. Ambhiavagar, M., and Jones, E. S.: Resuscitation of the moribund asthmatic, *Anaesthesia* 22: 375, 1967.
9. Shnider, S. M., and Papper, E. M.: Anesthesia for the asthmatic patient, *ANESTHESIOLOGY* 22: 886, 1961.
10. Gold, M. I., and Helrich, M.: A study of the complications related to anesthesia in asthmatic patients, *Anesth. Analg.* 42: 283, 1963.
11. Brown, D.: Halothane-oxygen anaesthesia for bronchoscopy, *Anaesthesia* 14: 135, 1959.
12. Morrow, R. C., Reed, E. M., and Abajian, J.: Application of fluothane anesthesia to otolaryngological surgery, *Laryngoscope* 71: 545, 1961.
13. Colgan, F. J.: Performance of lungs and bronchi during inhalation anesthesia, *ANESTHESIOLOGY* 26: 778, 1965.
14. Klide, A. M., and Aviado, D. M.: Mechanism for the reduction in pulmonary resistance induced by halothane, *J. Pharmacol. Exp. Ther.* 158: 28, 1967.
15. Hickey, R. F., Graf, P. D., Nadel, J. A., and Larson, C. P., Jr.: The effects of halothane and cyclopropane on total pulmonary resistance in the dog, *ANESTHESIOLOGY* 31: 334, 1969.
16. Wells, R. E., Jr.: Mechanics of respiration in bronchial asthma, *Amer. J. Med.* 26: 384, 1959.
17. Gold, M. I., and Helrich, M.: Pulmonary compliance during anesthesia, *ANESTHESIOLOGY* 26: 281, 1965.
18. Gold, M. I., and Helrich, M.: Mechanics of breathing during anesthesia: 2. The influence of airway adequacy, *ANESTHESIOLOGY* 26: 751, 1965.
19. Gold, M. I., Han, Y. H., and Helrich, M.: Pulmonary mechanics during anesthesia: III. Influence of intermittent positive pressure and relation to blood gases, *Anesth. Analg.* 45: 631, 1966.
20. McFadden, E. R., Jr., and Lyons, H. A.: Arterial-blood gas tension in asthma, *New Eng. J. Med.* 278: 1027, 1968.
21. Rees, H. A., Millar, J. S., and Donald, K. W.: Adrenaline in bronchial asthma, *Lancet* 2: 1164, 1967.
22. Rees, H. A., Borthwick, R. C., Millar, J. S., and Donald, K. W.: Aminophylline in bronchial asthma, *Lancet* 2: 1167, 1967.
23. Misuraca, L.: Mechanical ventilation in status asthmaticus, *New Eng. J. Med.* 275: 318, 1966.
24. Tomari, Z., and Widdicombe, J. G.: Muscular bronchomotor and cardiovascular reflexes elicited by mechanical stimulation of the respiratory tract, *J. Physiol.* 200: 25, 1969.
25. Simonsson, B. G., Jacobs, F. M., and Nadel, J. A.: Role of autonomic nervous system and the cough reflex in the increased responsiveness of airways in patients with obstructive airway disease, *J. Clin. Invest.* 46: 1812, 1967.

### Drugs

**ASPIRIN AND BLEEDING TIME** The technique for a standardized, reproducible Ivy bleeding time is described and used to compare the effects of aspirin and those of a placebo on the bleeding times of 60 normal male subjects. Following 1 g of aspirin orally, the mean bleeding time was 9 min, 30 sec, compared with 5 min, 30 sec after placebo and 5 min in the control state. The difference between the mean bleeding times after placebo and after aspirin was highly significant statistically. The data support the conclusion that small amounts of aspirin may exert significant effects upon hemostasis in normal individuals. (*Mielke, C. H., and others: The Standardized Normal Ivy Bleeding Time and Its Prolongation by Aspirin, Blood* 34: 204 (Aug.) 1969.)

**ANTIVENIN FOR PANCREATITIS** Acute hemorrhagic pancreatitis was established in dogs by injection of bile under pressure. This is thought to allow pancreatic enzymes to penetrate the interstitium and initiate the pancreatitis. Pancreatic enzymes are closely related chemically and immunologically to those in snake venom. The control animals had 100 per cent mortality in 17 hours. Animals treated with a polyvalent antivenin survived an average of 27 hours, and a quarter of the group survived several days. The mechanism of the protective effect of antivenin has not been established. (*Rittenbury, M., and Hanback, L.: Snake Antivenin, Arch. Surg.* 99: 179 (Aug.) 1969.)
